# Supplementary material for: In situ synthesis of a Fe3S4/MIL-53(Fe) hybrid catalyst for an efficient electrocatalytic hydrogen evolution reaction
Source: Royal Society of Chemistry journal article supplement (doi:10.1039/c9cc01433k), 2019-01-01
Supplement: c9cc01433k1.pdf [file c9cc01433k1.pdf]

## ***Electronic Supplementary Information for***

### **In Situ Synthesis of Fe<sub>3</sub>S<sub>4</sub>/MIL-53(Fe) hybrid catalyst for Efficient**

#### **Electrocatalytic Hydrogen Evolution**

Dan-Dan Huang, Shuang Li,\* Ya-Pan Wu, Jun-Hua Wei, Jing-Wei Yi, Hai-Meng Ma, Qi-Chun Zhang, Yun-Ling Liu and Dong-Sheng Li\*

*College of Materials and Chemical Engineering, Key Laboratory of Inorganic Nonmetallic Crystalline and Energy Conversion Materials, China Three Gorges University, Yichang, 443002, P. R. China. E-mail address: [lishmail@126.com](mailto:lishmail@126.com); [lidongshengl@126.com](mailto:lidongshengl@126.com).*

#### **S1. Experimental section**

**Materials:** All reactants and solvents were purchased and used without purification. Shanghai Mclean company provided ferric chloride hexahydrate (FeCl<sub>3</sub>·6H<sub>2</sub>O), dimethylformamide (DMF), terephthalic acid (1, 4-BDC), dimethylformamide (DMF), ethylene glycol (EG) and Ethanol. Thioacetamide (TAA) was bought from Aladdin Chemicals. Nafion solution (5 wt%) were purchased from Macklin Chemical Reagent.

**Preparation of MIL-53(Fe):** MIL-53(Fe) was prepared using a modification of the method previously reported.<sup>1</sup> In a typical synthesis, 0.1 mmol of 1, 4-BDC and 0.1 mmol of FeCl<sub>3</sub>·6H<sub>2</sub>O were dissolved in 12 mL of DMF with vigorous stirring to form a homogenous yellow solution. After being stirred for 30 min, the mixture solution was transferred into a Teflon-line stainless steel autoclave of 20 mL capacity, which was heated at a temperature of 160 °C for 12 h and then cooled to room temperature naturally. Finally, the obtained light yellow crystals were collected by centrifugation, washed with distilled water and ethanol, and dried at 60 °C under vacuum for further characterization.

**Preparation of Fe<sub>3</sub>S<sub>4</sub>(x wt%)/MIL-53 (x = 0, 31.3, 43.2, 52.1, and 82.8):** The hybrid catalysts were prepared by a simple solvothermal method. In detailed, 10 mg of the as-obtained MIL-53(Fe) crystals in light yellow color was dispersed in 10 mL of the anhydrous ethanol under sonication for 15 min to obtain a homogeneous solution; 2.0 mmol of TAA was then added to the solution while stirring for 30 min.

Afterward, the mixture was transferred into a 25 mL of Teflon-lined stainless steel autoclave and maintained at 140°C, 160°C, 180°C for 3 h, 180°C for 5 h, respectively. Then the reaction system was allowed to cool down to room temperature naturally. The resulting products were collected by centrifugation, washed with distilled water and ethanol several times, and then dried at 60°C under vacuum. Samples with 31.3 wt%, 43.2 wt%, 52.1 wt%, and 82.8 wt% Fe<sub>3</sub>S<sub>4</sub> loading were obtained, as measured by inductively coupled plasma-atomic emission spectrometry.

**Preparation of Fe<sub>3</sub>S<sub>4</sub>:** Fe<sub>3</sub>S<sub>4</sub> was synthesized by a method reported previously.<sup>[2]</sup> In detail, 0.48 g of FeCl<sub>3</sub>·6H<sub>2</sub>O (1.78 mmol) and 1.052 g of TAA (14 mmol) were respectively dissolved in 25 mL EG, and the two solutions were mixed together. After being stirred for 30 min, the solution was transferred into a 100 mL Teflon-lined stainless steel autoclave and maintained at 160 °C for 2 h. Then the reaction system was allowed to cool down to room temperature naturally. The obtained product was collected by centrifugation, washed with distilled water and ethanol, and dried at 60 °C under vacuum.

**Characterization:** X-ray diffraction (XRD) was performed on a Rigaku Ultima IV diffractometer with Cu K $\alpha$  radiation ( $\lambda$ =1.5406 Å). The transmission electron microscopy (TEM) image was carried out on a JEM-2100F field emission electron microscope at an acceleration voltage of 200 kV. High-angle annular dark-field scanning transmission spectroscopy (HAADF-STEM) image and corresponding energy-dispersive spectroscopy (EDS) mapping analyses were performed on a JEOL JEM-ARF 200F TEM/STEM with a spherical aberration corrector. The field emission scanning electron microscopy (FESEM) images were taken on a JEOL JSM-6700F SEM. X-ray photoelectron spectra (XPS) was acquired on an ESCALAB MK II with Mg K $\alpha$  as the excitation source. FT-IR spectra (KBr pellets) were conducted on a Thermo Electron NEXUS 670 FTIR spectrometer. The inductively coupled plasma (ICP) emission spectra were carried out on a Perkin Elmer Optima 7300DV ICP emission spectroscope.

**Electrochemical measurements:** All the electrochemical measurements were

performed in a standard three-electrode system using an electrochemical workstation (CHI660E). A saturated calomel electrode (SCE) as the reference electrode, and a graphite rod as the counter electrode, the glassy carbon (GC) disk electrode with catalysts (3 mm in diameter) as the working electrode. Typically, to prepare the working electrode, 4 mg of catalyst with 30  $\mu$ L Nafion solution (5 wt%) were dispersed in 1 mL of water/ethanol mixture solution (volume ratio of 3:1) with the assistance of sonication for 40 min to form a homogeneous ink. Then, 5  $\mu$ L of the catalyst ink (containing 20  $\mu$ g of catalyst) was loaded onto the glassy carbon electrode (catalyst loading 0.285 mg cm<sup>-2</sup>). Linear sweep voltammetry (LSV) and Cyclic voltammetry (CV) with a scan rate of 5 mV s<sup>-1</sup> were performed in 0.5 M H<sub>2</sub>SO<sub>4</sub>. All potentials in this study were calibrated to the reversible hydrogen electrode (RHE) based on the formula  $E_{\text{RHE}} = E_{\text{SCE}} + 0.241\text{V} + 0.0591 \text{ pH V}$ . The electrochemical impedance spectroscopy was performed in the frequency range from 0.1 to 100 KHz.

## S2. Additional characterization information

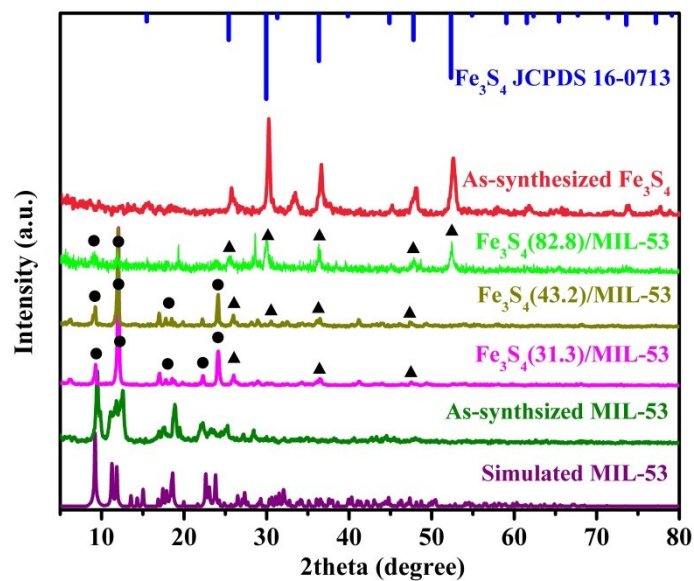

**Figure S1.** The XRD patterns of simulated MIL-53(Fe), as-obtained MIL-53(Fe), Fe<sub>3</sub>S<sub>4</sub> and the other three Fe<sub>3</sub>S<sub>4</sub>( $x$  wt%)/MIL-53( $x$  = 31.3, 43.2, 82.8) hybrid catalysts.

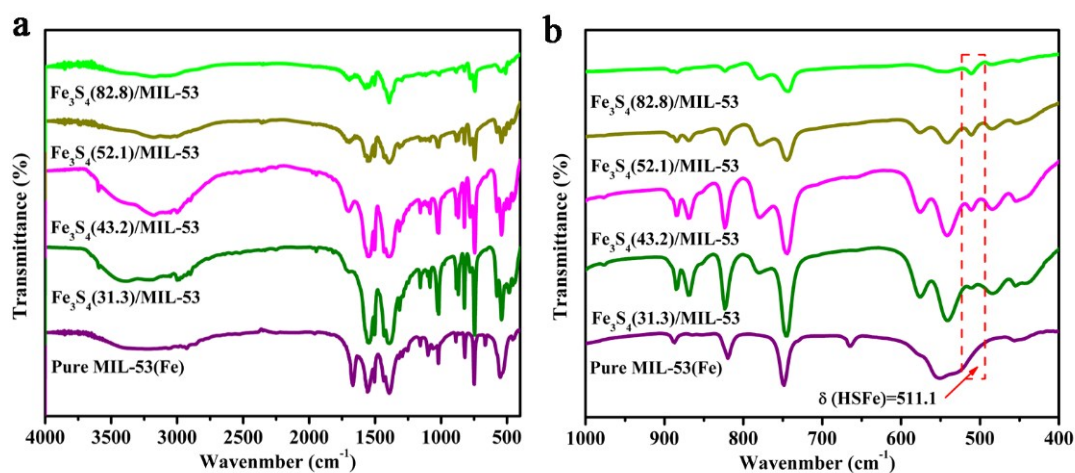

**Figure S2.** FT-IR spectra of MIL-53(Fe) and Fe<sub>3</sub>S<sub>4</sub>( $x$  wt%)/MIL-53( $x$  = 31.3, 43.2, 52.1, 82.8).

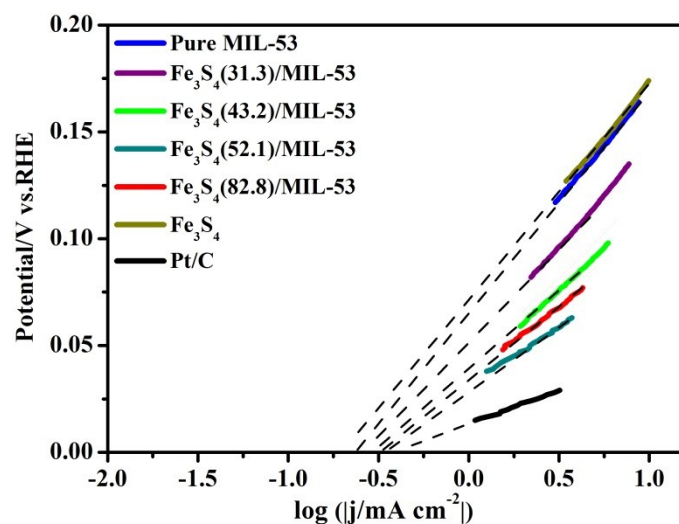

**Figure S3.** Calculated exchange current densities of various samples by applying extrapolation method to the Tafel plots.

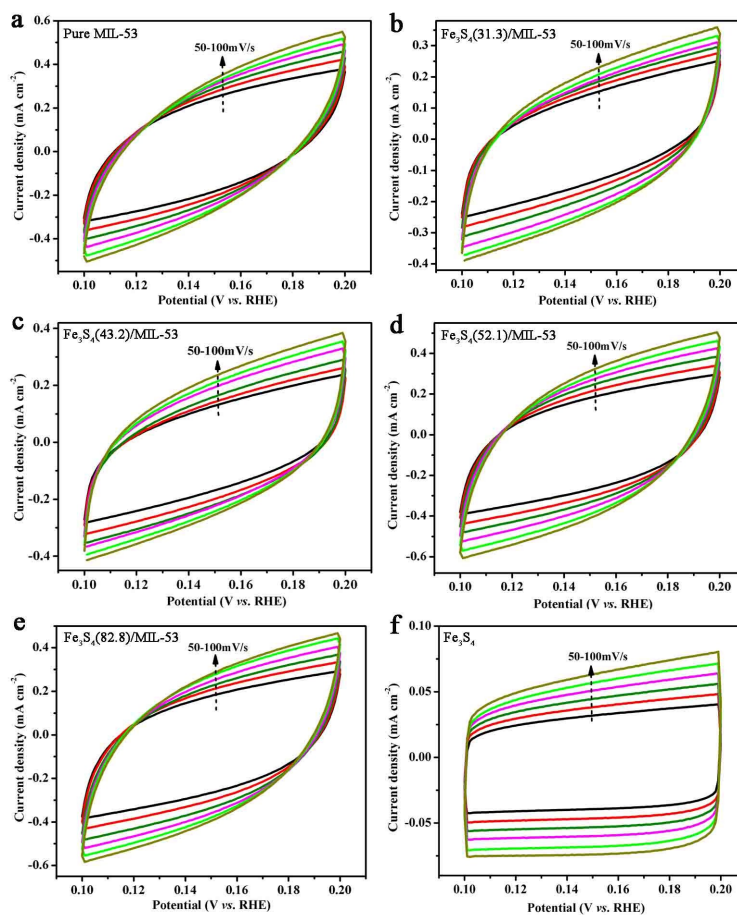

**Figure S4.** Cyclic voltammety curves of (a) MIL-53(Fe); (b-e)  $\text{Fe}_3\text{S}_4(x \text{ wt}\%)/\text{MIL-53}$  ( $x = 31.3, 43.2, 52.1, 82.8$ ) and (f)  $\text{Fe}_3\text{S}_4$  in the region of 0.1-0.2 V vs. RHE at scan rates from 50 to 100 mV/s.

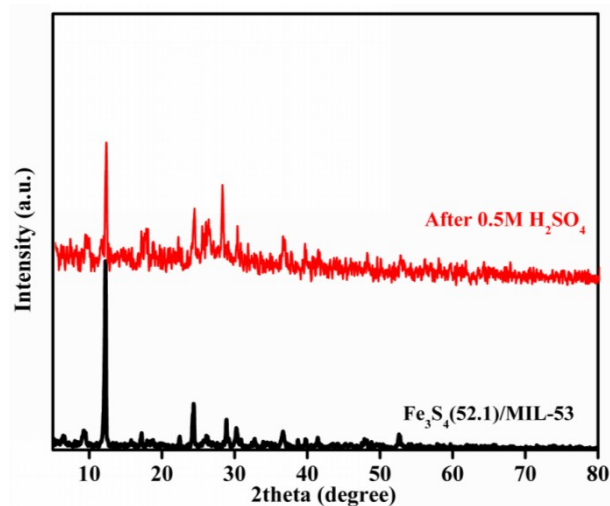

**Figure S5.** The XRD pattern of  $\text{Fe}_3\text{S}_4(52.1 \text{ wt}\%)/\text{MIL-53}$  after the acidic treatment in 0.5 M  $\text{H}_2\text{SO}_4$  for 50 h.

| <b>Catalysts</b>                            | <b>Onset potential (mV)</b> | <b><math>\eta_{10}</math> (mV)</b> | <b>Tafel slope (<math>\text{mV} \cdot \text{dec}^{-1}</math>)</b> | <b>Exchange current density <math>j_0</math> (<math>\mu\text{A cm}^{-2}</math>)</b> | <b>Double-layer capacitance <math>C_{dl}(\text{mF cm}^{-2})</math></b> |
|---------------------------------------------|-----------------------------|------------------------------------|-------------------------------------------------------------------|-------------------------------------------------------------------------------------|------------------------------------------------------------------------|
| 20%Pt/C                                     | 0                           | 43                                 | 31                                                                |                                                                                     |                                                                        |
| MIL-53(Fe)                                  | 104                         | 172                                | 99                                                                | 229                                                                                 | 1.7                                                                    |
| $\text{Fe}_3\text{S}_4(31.3)/\text{MIL-53}$ | 80                          | 151                                | 93                                                                | 257                                                                                 | 1.75                                                                   |
| $\text{Fe}_3\text{S}_4(43.2)/\text{MIL-53}$ | 65                          | 121                                | 80                                                                | 295                                                                                 | 1.89                                                                   |
| $\text{Fe}_3\text{S}_4(52.1)/\text{MIL-53}$ | 48                          | 92                                 | 60                                                                | 363                                                                                 | 2.7                                                                    |
| $\text{Fe}_3\text{S}_4(82.8)/\text{MIL-53}$ | 56                          | 108                                | 69                                                                | 331                                                                                 | 2.3                                                                    |
| $\text{Fe}_3\text{S}_4$                     | 110                         | 185                                | 101                                                               | 199                                                                                 | 0.7                                                                    |

**Table S2| Comparison of HER performance for Fe<sub>3</sub>S<sub>4</sub>(52.1 wt%)/MIL-53 with other electrocatalysts.**

| Catalysts                                              | Onset potential(mV) | Tafelslope (mV·dec <sup>-1</sup> ) | $\eta_{10}$ (mV) | Ref.             |
|--------------------------------------------------------|---------------------|------------------------------------|------------------|------------------|
| 20%Pt/C                                                | 0                   | 31                                 | 43               |                  |
| micro-FeS <sub>2</sub> -RGO                            | 70                  | 66                                 | 139              | (3)              |
| mesoporous FeS <sub>2</sub>                            | 30                  | 78                                 | 96               | (4)              |
| FeS <sub>2</sub>                                       | -                   | 62.5                               | -                | (5)              |
| Fe-MoS <sub>2</sub> NF                                 | 100                 | 82                                 | 136              | (6)              |
| (Fe <sub>0.48</sub> Co <sub>0.52</sub> )S <sub>2</sub> | 143                 | 47.5                               | 196              | (7)              |
| Fe <sub>1-x</sub> Co <sub>x</sub> S <sub>2</sub> /CNT  | -                   | 46                                 | 120/20           | (8)              |
| Fe <sub>3</sub> S <sub>4</sub> (52.1 wt%)/MIL-53       | 48                  | 60                                 | 92               | <i>This work</i> |

**Reference:**

1. F-L. Li, Q. Shao, X. Q. Huang and J-P. Lang, *Angew. Chem., Int. Ed.*, 2018, **130**, 1906.
2. Y-J. Zhang, J. Qu, S-M. Hao, W. Chang, Q-Y. Ji and Z-Z. Yu, *ACS Appl. Mater. Interfaces.*, 2017, **9**, 41878.
3. Y. N. Chen, S. M. Xu, Y. C. Li, R. J. Jacob, Y. D. Kuang, B. Y. Liu, Y. L. Wang, G. Pastel, L. G. Salamanca-Riba, M. R. Zachariah and L. B. Hu, *Adv. Energy Mater.*, 2017, **7**, 1700482.
4. R. Miao, B. Dutta, S. Sahoo, J. He, W. Zhong, S. A. Cetegen, T. Jiang, S. P. Alpay and S. L. Suib, *J. Am. Chem. Soc.*, 2017, **139**, 13604.
5. D. S. Kong, J. J. Cha, H. T. Wang, H. R. Lee and Y. Cui, *Energy Environ. Sci.*, 2013, **6**, 3553.
6. X. Zhao, X. Ma, Q. Q. Lu, Q. Li, C. Han, Z. C. Xing and X. R. Yang, *Electrochim. Acta*, 2017, **249**, 72.
7. M. S. Faber, M. A. Lukowski, Q. Ding, N. S. Kaiser and S. Jin, *J. Phys. Chem. C*, 2014, **118**, 21347.
8. D. Y. Wang, M. Gong, H. L. Chou, C. J. Pan, H. A. Chen, Y. Wu, M. C. Lin, M. Guan, J. Yang, C. W. Chen, Y. L. Wang, B. J. Hwang, C. C. Chen and H. Dai, *J. Am. Chem. Soc.*, 2015, **137**, 1587.
